# Supplementary material
Source: PubMed Central journal article supplement (PMC3923418)
Supplement: NIHMS540706-supplement-Supp_Fig_S1__Table_S1-S2.pdf [file NIHMS540706-supplement-Supp_Fig_S1__Table_S1-S2.pdf]

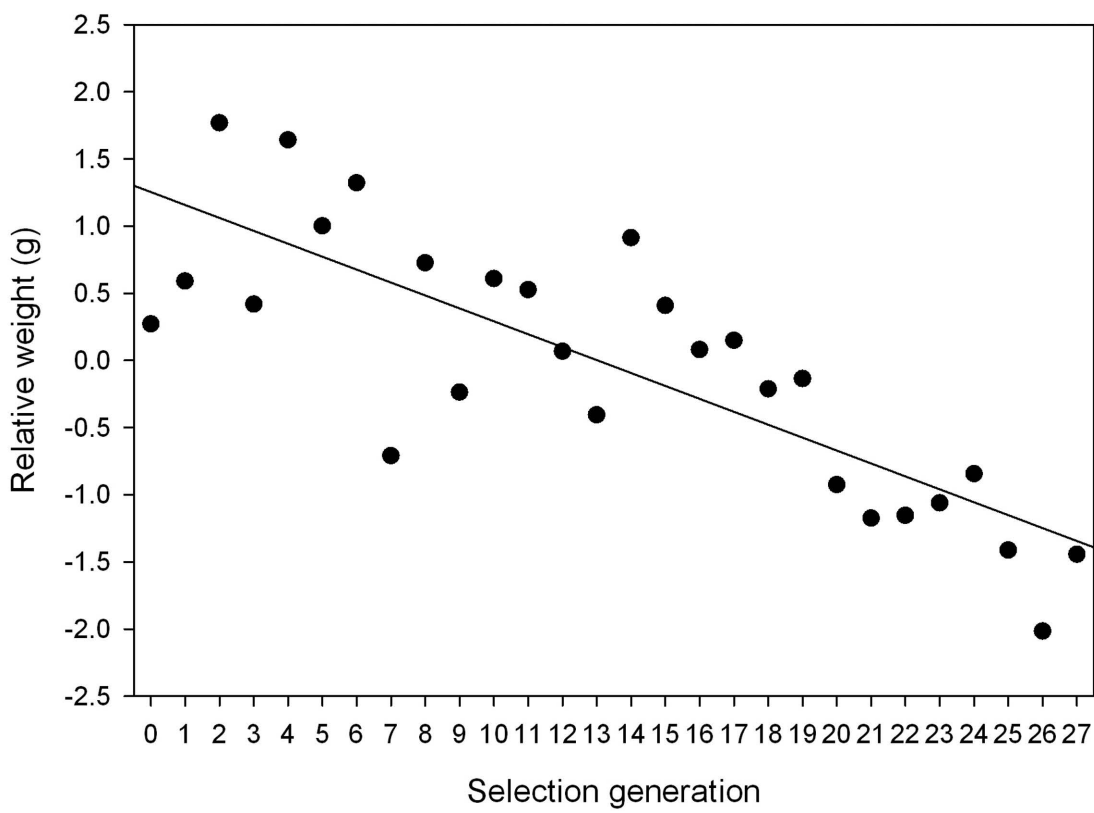

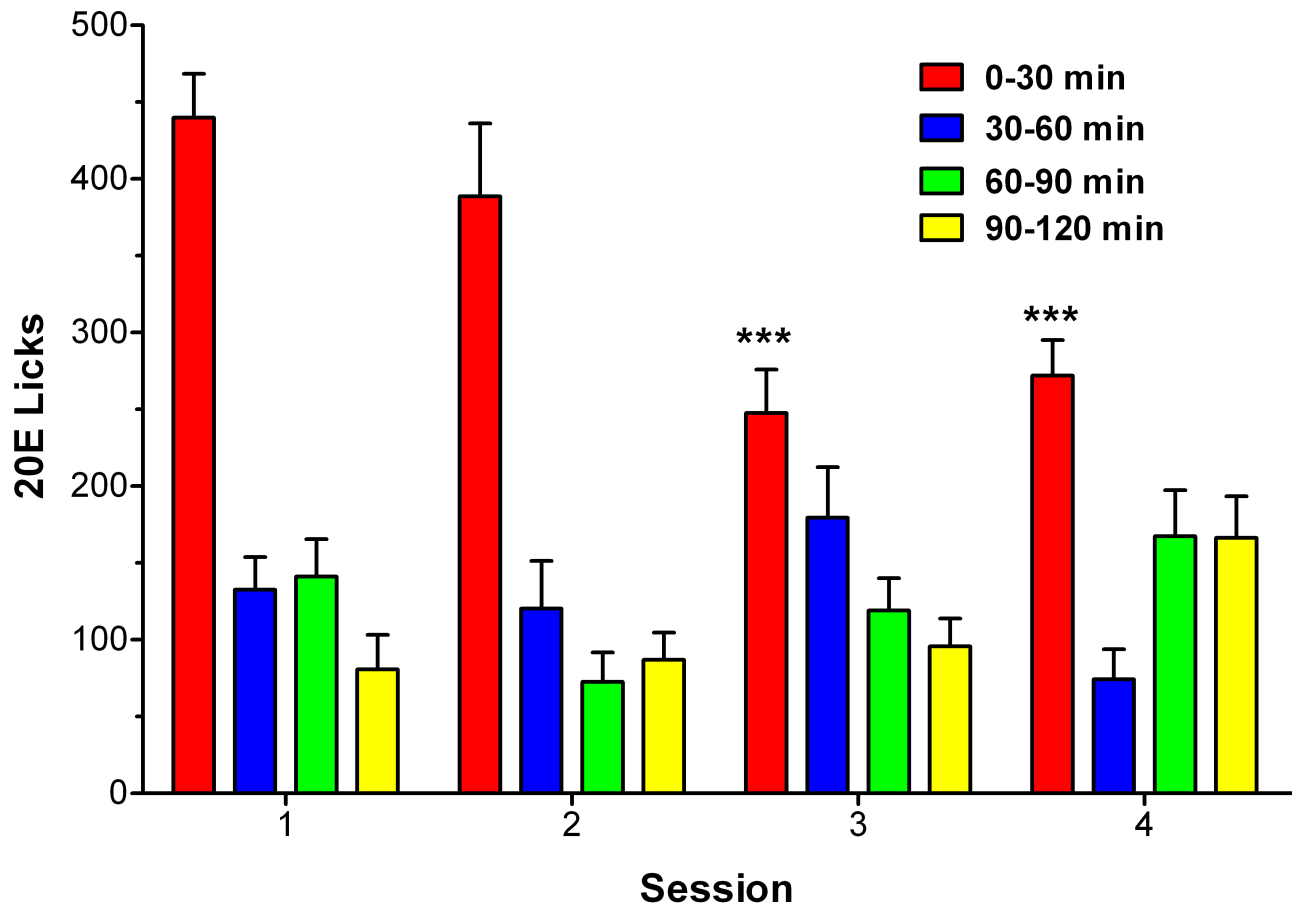

Supplemental Table S1. Generational Data on Two Replicated Selections for Blood Ethanol Concentration (BEC) after Drinking in the Dark

|                      |                         | HDID-1 |                            |                         |            |                 | HDID-2 |                            |                         |            |                 |
|----------------------|-------------------------|--------|----------------------------|-------------------------|------------|-----------------|--------|----------------------------|-------------------------|------------|-----------------|
| Selection Generation | Sex or Selected Parents | N      | BEC (mg/ml)                | 4 hr Consumption (g/kg) | Age (d)    | Body Weight (g) | N      | BEC (mg/ml)                | 4 hr Consumption (g/kg) | Age (d)    | Body Weight (g) |
| <b>S<sub>0</sub></b> | <b>Female</b>           | 82     | 0.35 ± 0.05                | 4.7 ± 0.26              | 87.8 ± 0.9 | 20.9 ± 0.3      | 96     | 0.32 ± 0.04                | 5.1 ± 0.23              | 75.6 ± 0.2 | 21.3 ± 0.3      |
|                      | <b>Male</b>             | 75     | 0.24 ± 0.05                | 3.3 ± 0.20              | 86.9 ± 0.9 | 25.9 ± 0.3      | 114    | 0.25 ± 0.04                | 3.7 ± 0.18              | 75.9 ± 0.2 | 26.4 ± 0.3      |
|                      | <b>Parents</b>          | 30     | 0.97 ± 0.07<br>(S = 0.674) | 5.5 ± 0.36              | --         | --              | 38     | 0.97 ± 0.05<br>(S = 0.684) | 6.0 ± 0.33              |            |                 |
| <b>S<sub>1</sub></b> | <b>Female</b>           | 81     | 0.31 ± 0.04                | 4.6 ± 0.24              | 66.3 ± 0.5 | 20.1 ± 0.2      | 72     | 0.27 ± 0.04                | 5.5 ± 0.29              | 61.3 ± 0.3 | 19.6 ± 0.2      |
|                      | <b>Male</b>             | 57     | 0.34 ± 0.06                | 4.1 ± 0.32              | 67.2 ± 0.5 | 25.7 ± 0.5      | 95     | 0.36 ± 0.04                | 4.6 ± 0.22              | 60.5 ± 0.4 | 23.6 ± 0.2      |
|                      | <b>Parents</b>          | 30     | 0.78 ± 0.08<br>(S = 0.460) | 5.8 ± 0.38              | --         | --              | 40     | 0.88 ± 0.05<br>(S = 0.562) | 6.0 ± 0.41              |            |                 |
| <b>S<sub>2</sub></b> | <b>Female</b>           | 67     | 0.47 ± 0.05                | 5.1 ± 0.27              | 65.7 ± 0.5 | 21.2 ± 0.2      | 83     | 0.40 ± 0.04                | 5.8 ± 0.27              | 96.2 ± 0.6 | 21.9 ± 0.2      |
|                      | <b>Male</b>             | 58     | 0.25 ± 0.04                | 3.6 ± 0.30              | 66.3 ± 0.5 | 26.7 ± 0.3      | 88     | 0.32 ± 0.04                | 3.8 ± 0.20              | 96.5 ± 0.6 | 27.6 ± 0.3      |
|                      | <b>Parents</b>          | 30     | 0.77 ± 0.07<br>(S = 0.398) | 5.5 ± 0.36              | --         | --              | 44     | 0.90 ± 0.04<br>(S = 0.538) | 6.6 ± 0.37              |            |                 |
| <b>S<sub>3</sub></b> | <b>Female</b>           | 70     | 0.61 ± 0.08                | 5.6 ± 0.27              | 56.1 ± 0.1 | 19.3 ± 0.2      | 96     | 0.60 ± 0.05                | 6.5 ± 0.21              | 81.0 ± 0.4 | 21.1 ± 0.1      |
|                      | <b>Male</b>             | 55     | 0.58 ± 0.08                | 4.7 ± 0.26              | 56.1 ± 0.1 | 24.4 ± 0.3      | 71     | 0.46 ± 0.05                | 4.7 ± 0.25              | 81.3 ± 0.5 | 26.3 ± 0.4      |
|                      | <b>Parents</b>          | 30     | 1.09 ± 0.10<br>(S = 0.496) | 6.5 ± 0.30              | --         | --              | 46     | 1.13 ± 0.04<br>(S = 0.591) | 6.8 ± 0.27              |            |                 |
| <b>S<sub>4</sub></b> | <b>Female</b>           | 49     | 0.40 ± 0.06                | 5.4 ± 0.28              | 82.4 ± 0.4 | 22.0 ± 0.3      | 92     | 0.49 ± 0.04                | 6.5 ± 0.22              | 66.5 ± 0.5 | 19.3 ± 0.2      |
|                      | <b>Male</b>             | 59     | 0.45 ± 0.05                | 4.8 ± 0.25              | 82.9 ± 0.2 | 26.5 ± 0.3      | 72     | 0.48 ± 0.05                | 5.1 ± 0.24              | 66.5 ± 0.6 | 24.4 ± 0.3      |
|                      | <b>Parents</b>          | 32     | 0.87 ± 0.07<br>(S = 0.441) | 6.4 ± 0.30              | --         | --              | 40     | 1.07 ± 0.04<br>(S = 0.589) | 7.0 ± 0.24              |            |                 |

|                                  |                         | HDID-1 |                            |                         |             |                 | HDID-2 |                            |                         |            |                 |
|----------------------------------|-------------------------|--------|----------------------------|-------------------------|-------------|-----------------|--------|----------------------------|-------------------------|------------|-----------------|
| Selection Generation             | Sex or Selected Parents | N      | BEC (mg/ml)                | 4 hr Consumption (g/kg) | Age (d)     | Body Weight (g) | N      | BEC (mg/ml)                | 4 hr Consumption (g/kg) | Age (d)    | Body Weight (g) |
| <b>S<sub>5</sub></b>             | <b>Female</b>           | 82     | 0.62 ± 0.05                | 6.3 ± 0.30              | 65.5 ± 0.5  | 20.3 ± 0.2      | 84     | 0.40 ± 0.05                | 6.9 ± 0.26              | 85.3 ± 0.7 | 21.5 ± 0.2      |
|                                  | <b>Male</b>             | 69     | 0.60 ± 0.06                | 5.0 ± 0.25              | 62.6 ± 0.7  | 24.6 ± 0.3      | 84     | 0.38 ± 0.05                | 5.3 ± 0.25              | 86.5 ± 0.6 | 27.9 ± 0.3      |
|                                  | <b>Parents</b>          | 36     | 1.19 ± 0.07<br>(S = 0.583) | 6.8 ± 0.37              | --          | --              | 40     | 1.11 ± 0.06<br>(S = 0.718) | 7.3 ± 0.32              |            |                 |
| <b>S<sub>6</sub></b>             | <b>Female</b>           | 78     | 0.56 ± 0.05                | 5.8 ± 0.23              | 70.7 ± 0.3  | 21.0 ± 0.3      | 82     | 0.47 ± 0.05                | 5.8 ± 0.24              | 91.8 ± 0.5 | 21.9 ± 0.2      |
|                                  | <b>Male</b>             | 84     | 0.50 ± 0.05                | 4.5 ± 0.23              | 70.7 ± 0.2  | 25.0 ± 0.3      | 85     | 0.60 ± 0.06                | 4.3 ± 0.21              | 92.1 ± 0.5 | 28.2 ± 0.4      |
|                                  | <b>Parents</b>          | 34     | 1.20 ± 0.04<br>(S = 0.675) | 6.5 ± 0.29              | --          | --              | 40     | 1.20 ± 0.05<br>(S = 0.659) | 6.3 ± 0.30              |            |                 |
| <b>S<sub>7</sub></b>             | <b>Female</b>           | 66     | 0.66 ± 0.06                | 5.7 ± 0.26              | 70.3 ± 0.5  | 19.0 ± 0.2      | 86     | 0.62 ± 0.06                | 6.5 ± 0.25              | 80.3 ± 0.3 | 21.5 ± 0.2      |
|                                  | <b>Male</b>             | 84     | 0.63 ± 0.06                | 5.0 ± 0.27              | 70.7 ± 0.4  | 24.3 ± 0.3      | 80     | 0.48 ± 0.06                | 5.2 ± 0.23              | 80.1 ± 0.4 | 27.3 ± 0.4      |
|                                  | <b>Parents</b>          | 36     | 1.33 ± 0.04<br>(S = 0.687) | 6.6 ± 0.29              | --          | --              | 40     | 1.25 ± 0.05<br>(S = 0.695) | 6.8 ± 0.27              |            |                 |
| <b>S<sub>8</sub><sup>*</sup></b> | <b>Female</b>           | 127    | 0.70 ± 0.05                | 5.8 ± 0.18              | 103.3 ± 0.9 | 22.2 ± 0.2      | 88     | 0.74 ± 0.07                | 6.2 ± 0.23              | 66.9 ± 0.1 | 21.4 ± 0.2      |
|                                  | <b>Male</b>             | 139    | 0.63 ± 0.04                | 4.3 ± 0.15              | 101.9 ± 1.0 | 27.6 ± 0.2      | 80     | 0.57 ± 0.06                | 4.5 ± 0.22              | 66.8 ± 0.1 | 27.3 ± 0.3      |
|                                  | <b>Parents</b>          | 32     | 1.54 ± 0.06<br>(S = 0.881) | 6.2 ± 0.36              | --          | --              | 38     | 1.46 ± 0.05<br>(S = 0.801) | 6.9 ± 0.26              | --         | --              |
| <b>S<sub>9</sub><sup>*</sup></b> | <b>Female</b>           | 67     | 0.90 ± 0.07                | 6.2 ± 0.24              | 60.7 ± 0.9  | 18.9 ± 0.2      | 82     | 0.83 ± 0.06                | 6.4 ± 0.23              | 59.2 ± 0.4 | 19.7 ± 0.2      |
|                                  | <b>Male</b>             | 69     | 0.84 ± 0.08                | 5.4 ± 0.27              | 60.3 ± 0.9  | 23.5 ± 0.3      | 83     | 0.72 ± 0.06                | 5.2 ± 0.20              | 59.3 ± 0.4 | 25.0 ± 0.2      |
|                                  | <b>Parents</b>          | 38     | 1.55 ± 0.05<br>(S = 0.679) | 7.3 ± 0.28              | --          | --              | 38     | 1.50 ± 0.04<br>(S = 0.722) | 6.9 ± 0.21              | --         | --              |

|                       |                         | HDID-1 |                            |                         |            |                 | HDID-2 |                            |                         |            |                 |
|-----------------------|-------------------------|--------|----------------------------|-------------------------|------------|-----------------|--------|----------------------------|-------------------------|------------|-----------------|
| Selection Generation  | Sex or Selected Parents | N      | BEC (mg/ml)                | 4 hr Consumption (g/kg) | Age (d)    | Body Weight (g) | N      | BEC (mg/ml)                | 4 hr Consumption (g/kg) | Age (d)    | Body Weight (g) |
| <b>S<sub>10</sub></b> | <b>Female</b>           | 74     | 0.83 ± 0.07                | 6.6 ± 0.29              | 73.4 ± 0.6 | 20.5 ± 0.2      | 72     | 0.77 ± 0.06                | 6.4 ± 0.27              | 68.5 ± 0.3 | 20.3 ± 0.2      |
|                       | <b>Male</b>             | 93     | 0.66 ± 0.06                | 5.4 ± 0.27              | 73.6 ± 0.5 | 25.3 ± 0.3      | 90     | 0.94 ± 0.06                | 5.7 ± 0.20              | 68.8 ± 0.3 | 25.5 ± 0.3      |
|                       | <b>Parents</b>          | 38     | 1.53 ± 0.05<br>(S = 0.797) | 7.7 ± 0.38              | --         | --              | 38     | 1.57 ± 0.05<br>(S = 0.701) | 6.9 ± 0.30              | --         | --              |
| <b>S<sub>11</sub></b> | <b>Female</b>           | 86     | 1.14 ± 0.06                | 7.0 ± 0.23              | 71.1 ± 0.6 | 20.2 ± 0.3      | 71     | 0.86 ± 0.08                | 6.1 ± 0.24              | 79.0 ± 0.5 | 21.8 ± 0.3      |
|                       | <b>Male</b>             | 81     | 1.02 ± 0.07                | 5.8 ± 0.25              | 70.4 ± 0.7 | 25.0 ± 0.3      | 92     | 0.88 ± 0.06                | 5.2 ± 0.20              | 79.9 ± 0.3 | 27.0 ± 0.3      |
|                       | <b>Parents</b>          | 36     | 1.80 ± 0.04<br>(S = 0.718) | 7.6 ± 0.34              | --         | --              | 28     | 1.59 ± 0.06<br>(S = 0.721) | 7.1 ± 0.31              | --         | --              |
| <b>S<sub>12</sub></b> | <b>Female</b>           | 81     | 0.99 ± 0.08                | 6.2 ± 0.25              | 75.8 ± 0.2 | 20.1 ± 0.2      | 62     | 1.24 ± 0.08                | 8.1 ± 0.29              | 61.6 ± 0.3 | 19.9 ± 0.2      |
|                       | <b>Male</b>             | 76     | 0.91 ± 0.07                | 5.0 ± 0.23              | 75.9 ± 0.2 | 25.0 ± 0.3      | 72     | 1.01 ± 0.07                | 6.3 ± 0.18              | 61.7 ± 0.3 | 24.6 ± 0.3      |
|                       | <b>Parents</b>          | 40     | 1.78 ± 0.07<br>(S = 0.826) | 7.2 ± 0.25              | --         | --              | 30     | 1.84 ± 0.07<br>(S = 0.723) | 8.0 ± 0.30              | --         | --              |
| <b>S<sub>13</sub></b> | <b>Female</b>           | 85     | 0.90 ± 0.05                | 6.6 ± 0.24              | 91.5 ± 0.5 | 20.5 ± 0.2      | 53     | 1.04 ± 0.08                | 7.8 ± 0.35              | 74.0 ± 0.2 | 22.6 ± 0.5      |
|                       | <b>Male</b>             | 83     | 0.78 ± 0.07                | 5.0 ± 0.21              | 91.3 ± 0.6 | 25.9 ± 0.4      | 75     | 0.93 ± 0.06                | 5.7 ± 0.22              | 74.2 ± 0.2 | 27.7 ± 0.4      |
|                       | <b>Parents</b>          | 36     | 1.56 ± 0.06<br>(S = 0.720) | 6.6 ± 0.25              | --         | --              | 36     | 1.58 ± 0.05<br>(S = 0.606) | 8.3 ± 0.36              | --         | --              |
| <b>S<sub>14</sub></b> | <b>Female</b>           | 69     | 1.01 ± 0.07                | 5.7 ± 0.24              | 87.3 ± 0.5 | 21.5 ± 0.3      | 63     | 0.86 ± 0.06                | 7.0 ± 0.30              | 81.3 ± 0.2 | 22.2 ± 0.3      |
|                       | <b>Male</b>             | 72     | 0.84 ± 0.07                | 4.5 ± 0.27              | 86.8 ± 0.5 | 26.9 ± 0.3      | 80     | 0.86 ± 0.05                | 5.4 ± 0.21              | 81.5 ± 0.2 | 29.6 ± 0.4      |
|                       | <b>Parents</b>          | 36     | 1.64 ± 0.06<br>(S = 0.712) | 6.3 ± 0.35              | --         | --              | 36     | 1.39 ± 0.03<br>(S = 0.532) | 7.0 ± 0.22              | --         | --              |

|                       |                         | HDID-1 |                            |                         |            |                 | HDID-2 |                            |                         |            |                 |
|-----------------------|-------------------------|--------|----------------------------|-------------------------|------------|-----------------|--------|----------------------------|-------------------------|------------|-----------------|
| Selection Generation  | Sex or Selected Parents | N      | BEC (mg/ml)                | 4 hr Consumption (g/kg) | Age (d)    | Body Weight (g) | N      | BEC (mg/ml)                | 4 hr Consumption (g/kg) | Age (d)    | Body Weight (g) |
| <b>S<sub>15</sub></b> | <b>Female</b>           | 82     | 0.91 ± 0.07                | 6.1 ± 0.29              | 63.0 ± 0.4 | 19.6 ± 0.2      | 79     | 1.05 ± 0.07                | 7.2 ± 0.21              | 82.5 ± 1.5 | 21.6 ± 0.3      |
|                       | <b>Male</b>             | 85     | 0.80 ± 0.06                | 4.6 ± 0.19              | 61.7 ± 0.6 | 23.5 ± 0.2      | 83     | 1.00 ± 0.07                | 5.7 ± 0.20              | 79.8 ± 1.2 | 27.8 ± 0.4      |
|                       | <b>Parents</b>          | 40     | 1.61 ± 0.05<br>(S = 0.750) | 6.9 ± 0.34              | --         | --              | 34     | 1.81 ± 0.05<br>(S = 0.787) | 7.6 ± 0.31              | --         | --              |
| <b>S<sub>16</sub></b> | <b>Female</b>           | 75     | 1.17 ± 0.08                | 6.1 ± 0.25              | 59.8 ± 0.4 | 19.1 ± 0.2      | 86     | 1.24 ± 0.06                | 8.1 ± 0.24              | 65.1 ± 1.0 | 20.2 ± 0.2      |
|                       | <b>Male</b>             | 82     | 1.18 ± 0.08                | 5.7 ± 0.26              | 59.1 ± 0.4 | 23.5 ± 0.3      | 74     | 1.04 ± 0.06                | 6.3 ± 0.21              | 64.1 ± 1.3 | 25.6 ± 0.3      |
|                       | <b>Parents</b>          | 40     | 2.04 ± 0.05<br>(S = 0.866) | 7.1 ± 0.21              | --         | --              | 36     | 1.80 ± 0.06<br>(S = 0.656) | 8.3 ± 0.28              | --         | --              |
| <b>S<sub>17</sub></b> | <b>Female</b>           | 77     | 1.16 ± 0.07                | 6.1 ± 0.23              | 66.5 ± 0.5 | 19.6 ± 0.2      | 79     | 1.24 ± 0.06                | 7.8 ± 0.22              | 80.1 ± 1.5 | 22.5 ± 0.2      |
|                       | <b>Male</b>             | 81     | 1.14 ± 0.07                | 5.2 ± 0.20              | 66.1 ± 0.5 | 24.3 ± 0.3      | 73     | 1.10 ± 0.07                | 5.8 ± 0.24              | 72.8 ± 1.5 | 27.7 ± 0.4      |
|                       | <b>Parents</b>          | 36     | 1.87 ± 0.05<br>(S = 0.726) | 7.1 ± 0.30              | --         | --              | 32     | 1.83 ± 0.05<br>(S = 0.664) | 7.7 ± 0.33              | --         | --              |
| <b>S<sub>18</sub></b> | <b>Female</b>           | 80     | 1.02 ± 0.07                | 6.9 ± 0.23              | 64.7 ± 0.5 | 19.1 ± 0.2      | 59     | 1.28 ± 0.06                | 7.7 ± 0.31              | 73.6 ± 1.6 | 21.6 ± 0.3      |
|                       | <b>Male</b>             | 74     | 1.07 ± 0.09                | 5.8 ± 0.21              | 64.6 ± 0.5 | 23.0 ± 0.3      | 69     | 1.15 ± 0.09                | 5.9 ± 0.24              | 78.2 ± 1.6 | 27.1 ± 0.4      |
|                       | <b>Parents</b>          | 34     | 1.90 ± 0.06<br>(S = 0.859) | 7.4 ± 0.38              | --         | --              | 38     | 1.91 ± 0.06<br>(S = 0.721) | 8.0 ± 0.28              | --         | --              |
| <b>S<sub>19</sub></b> | <b>Female</b>           | 59     | 1.22 ± 0.09                | 6.4 ± 0.21              | 64.6 ± 0.4 | 19.2 ± 0.2      | 66     | 1.06 ± 0.06                | 7.7 ± 0.24              | 89.5 ± 1.0 | 22.6 ± 0.3      |
|                       | <b>Male</b>             | 75     | 1.27 ± 0.10                | 5.8 ± 0.20              | 64.3 ± 0.4 | 22.9 ± 0.2      | 65     | 1.21 ± 0.07                | 6.3 ± 0.27              | 89.7 ± 1.0 | 28.5 ± 0.5      |
|                       | <b>Parents</b>          | 34     | 2.13 ± 0.07<br>(S = 0.883) | 7.2 ± 0.16              | --         | --              |        | 1.70 ± 0.04<br>(S = 0.562) | 8.0 ± 0.27              | --         | --              |

|                       |                         | HDID-1 |                            |                         |             |                 | HDID-2 |             |                         |            |                 |
|-----------------------|-------------------------|--------|----------------------------|-------------------------|-------------|-----------------|--------|-------------|-------------------------|------------|-----------------|
| Selection Generation  | Sex or Selected Parents | N      | BEC (mg/ml)                | 4 hr Consumption (g/kg) | Age (d)     | Body Weight (g) | N      | BEC (mg/ml) | 4 hr Consumption (g/kg) | Age (d)    | Body Weight (g) |
| <b>S<sub>20</sub></b> | <b>Female</b>           | 63     | 1.24 ± 0.09                | 7.3 ± 0.26              | 65.6 ± 0.2  | 18.5 ± 0.2      | 60     | 1.39 ± 0.08 | 7.9 ± 0.30              | 73.4 ± 0.5 | 22.4 ± 0.4      |
|                       | <b>Male</b>             | 56     | 1.46 ± 0.11                | 6.7 ± 0.28              | 65.9 ± 0.2  | 23.2 ± 0.3      | 65     | 1.13 ± 0.07 | 6.2 ± 0.17              | 73.2 ± 0.5 | 26.9 ± 0.3      |
|                       | <b>Parents</b>          | 36     | 2.22 ± 0.07<br>(S = 0.880) | 8.0 ± 0.27              | --          | --              |        |             |                         | --         | --              |
| <b>S<sub>21</sub></b> | <b>Female</b>           | 74     | 1.22 ± 0.08                | 6.5 ± 0.25              | 82.6 ± 0.23 | 19.2 ± 0.2      |        |             |                         |            |                 |
|                       | <b>Male</b>             | 90     | 1.22 ± 0.08                | 5.6 ± 0.23              | 83.1 ± 0.14 | 23.9 ± 0.3      |        |             |                         |            |                 |
|                       | <b>Parents</b>          | 36     | 2.10 ± 0.05<br>(S = 0.881) | 7.7 ± 0.31              | --          | --              |        |             |                         |            |                 |
| <b>S<sub>22</sub></b> | <b>Female</b>           | 98     | 1.16 ± 0.07                | 6.6 ± 0.24              | 66.4 ± 0.5  | 18.3 ± 0.2      |        |             |                         |            |                 |
|                       | <b>Male</b>             | 70     | 1.10 ± 0.08                | 5.1 ± 0.21              | 65.8 ± 0.6  | 23.3 ± 0.2      |        |             |                         |            |                 |
|                       | <b>Parents</b>          | 36     | 1.98 ± 0.05<br>(S = 0.852) | 7.4 ± 0.38              | --          | --              |        |             |                         |            |                 |
| <b>S<sub>23</sub></b> | <b>Female</b>           | 66     | 1.28 ± 0.09                | 6.39 ± 0.27             | 65.9 ± 1.2  | 18.3 ± 0.2      |        |             |                         |            |                 |
|                       | <b>Male</b>             | 75     | 1.32 ± 0.09                | 6.0 ± 0.26              | 63.9 ± 1.1  | 22.9 ± 0.3      |        |             |                         |            |                 |
|                       | <b>Parents</b>          | 38     | 2.09 ± 0.04<br>(S = 0.788) | 7.3 ± 0.26              | --          | --              |        |             |                         |            |                 |
| <b>S<sub>24</sub></b> | <b>Female</b>           | 67     | 1.03 ± 0.09                | 6.7 ± 0.27              | 79.5 ± 1.7  | 19.4 ± 0.3      |        |             |                         |            |                 |
|                       | <b>Male</b>             | 76     | 0.96 ± 0.08                | 5.8 ± 0.18              | 79.6 ± 1.7  | 24.0 ± 0.3      |        |             |                         |            |                 |
|                       | <b>Parents</b>          | 40     | 1.83 ± 0.05<br>(S = 0.832) | 7.5 ± 0.26              | --          | --              |        |             |                         |            |                 |

|                       |                         | HDID-1 |                            |                         |            |                 | HDID-2 |             |                         |         |                 |
|-----------------------|-------------------------|--------|----------------------------|-------------------------|------------|-----------------|--------|-------------|-------------------------|---------|-----------------|
| Selection Generation  | Sex or Selected Parents | N      | BEC (mg/ml)                | 4 hr Consumption (g/kg) | Age (d)    | Body Weight (g) | N      | BEC (mg/ml) | 4 hr Consumption (g/kg) | Age (d) | Body Weight (g) |
| <b>S<sub>25</sub></b> | <b>Female</b>           | 57     | 1.18 ± 0.09                | 6.2 ± 0.28              | 71.0 ± 1.9 | 18.4 ± 0.2      |        |             |                         |         |                 |
|                       | <b>Male</b>             | 84     | 1.16 ± 0.08                | 6.2 ± 0.30              | 72.7 ± 1.5 | 23.6 ± 0.2      |        |             |                         |         |                 |
|                       | <b>Parents</b>          | 36     | 1.96 ± 0.09<br>(S = 0.789) | 6.7 ± 0.28              | --         | --              |        |             |                         |         |                 |
| <b>S<sub>26</sub></b> | <b>Female</b>           | 46     | 1.32 ± 0.10                | 7.6 ± 0.26              | 91.8 ± 1.1 | 18.9 ± 0.3      |        |             |                         |         |                 |
|                       | <b>Male</b>             | 52     | 1.35 ± 0.10                | 6.3 ± 0.29              | 92.6 ± 0.9 | 23.5 ± 0.3      |        |             |                         |         |                 |
|                       | <b>Parents</b>          | 34     | 2.00 ± 0.05<br>(S = 0.660) | 8.0 ± 0.21              | --         | --              |        |             |                         |         |                 |
| <b>S<sub>27</sub></b> | <b>Female</b>           | 55     | 1.29 ± 0.08                | 7.1 ± 0.23              | 65.5 ± 0.2 | 18.0 ± 0.3      |        |             |                         |         |                 |
|                       | <b>Male</b>             | 48     | 1.61 ± 0.10                | 7.0 ± 0.30              | 65.5 ± 0.2 | 23.1 ± 0.4      |        |             |                         |         |                 |

\* In these generations, first and second litters were tested.



Supplemental Table S2. Cumulative Inbreeding Coefficients during Selection

| Selection Generation | HDID-1             |         |                | HDID-2             |         |                |
|----------------------|--------------------|---------|----------------|--------------------|---------|----------------|
|                      | Number of Families | $N_e^*$ | Cum $\Delta F$ | Number of Families | $N_e^*$ | Cum $\Delta F$ |
| S <sub>0</sub>       | 15                 | --      | --             | 19                 | --      | --             |
| S <sub>1</sub>       | 15                 | 62      | 0.008          | 20                 | 42      | 0.012          |
| S <sub>2</sub>       | 15                 | 62      | 0.016          | 22                 | 46      | 0.023          |
| S <sub>3</sub>       | 15                 | 62      | 0.024          | 23                 | 48      | 0.033          |
| S <sub>4</sub>       | 16                 | 66      | 0.032          | 20                 | 42      | 0.045          |
| S <sub>5</sub>       | 18                 | 74      | 0.039          | 20                 | 42      | 0.057          |
| S <sub>6</sub>       | 17                 | 36      | 0.052          | 20                 | 42      | 0.069          |
| S <sub>7</sub>       | 18                 | 38      | 0.066          | 20                 | 42      | 0.081          |
| S <sub>8</sub>       | 16                 | 34      | 0.080          | 19                 | 40      | 0.093          |
| S <sub>9</sub>       | 19                 | 40      | 0.093          | 19                 | 40      | 0.106          |
| S <sub>10</sub>      | 19                 | 40      | 0.105          | 19                 | 40      | 0.118          |
| S <sub>11</sub>      | 18                 | 38      | 0.118          | 14                 | 30      | 0.135          |
| S <sub>12</sub>      | 20                 | 42      | 0.130          | 15                 | 32      | 0.151          |
| S <sub>13</sub>      | 18                 | 38      | 0.143          | 18                 | 38      | 0.164          |
| S <sub>14</sub>      | 18                 | 38      | 0.157          | 18                 | 38      | 0.177          |
| S <sub>15</sub>      | 20                 | 42      | 0.169          | 17                 | 36      | 0.191          |
| S <sub>16</sub>      | 20                 | 42      | 0.180          | 18                 | 38      | 0.204          |
| S <sub>17</sub>      | 18                 | 38      | 0.194          | 16                 | 34      | 0.219          |
| S <sub>18</sub>      | 17                 | 36      | 0.208          | 19                 | 40      | 0.231          |
| S <sub>19</sub>      | 17                 | 36      | 0.221          | 20                 | 42      | 0.243          |
| S <sub>20</sub>      | 18                 | 38      | 0.235          |                    |         |                |
| S <sub>21</sub>      | 18                 | 38      | 0.248          |                    |         |                |
| S <sub>22</sub>      | 18                 | 38      | 0.261          |                    |         |                |

|                 | HDID-1 |    |       | HDID-2 |  |  |
|-----------------|--------|----|-------|--------|--|--|
| S <sub>23</sub> | 19     | 40 | 0.273 |        |  |  |
| S <sub>24</sub> | 20     | 42 | 0.285 |        |  |  |
| S <sub>25</sub> | 18     | 38 | 0.298 |        |  |  |
| S <sub>26</sub> | 17     | 36 | 0.312 |        |  |  |
|                 |        |    |       |        |  |  |

\* N<sub>e</sub> changes as a function of number of breeders and breeding scheme (Falconer & Mackay, 1996).

Supplemental Table S3. Percent Intake during Last 2 hrs of 4 hr DID Test for Several Generations

|                      | HDID-1                                  | HDID-2                                  |
|----------------------|-----------------------------------------|-----------------------------------------|
| Selection Generation | Percentage of total consumed in hrs 2-4 | Percentage of total consumed in hrs 2-4 |
| S <sub>0</sub>       | 60.9 ± 1.8                              | 56.0 ± 1.3                              |
| S <sub>1</sub>       | 59.3 ± 1.6                              | 63.2 ± 1.1                              |
| S <sub>2</sub>       | 59.5 ± 1.9                              | 59.8 ± 1.4                              |
| S <sub>3</sub>       | 58.4 ± 1.7                              | 63.1 ± 1.3                              |
| S <sub>4</sub>       | 61.3 ± 1.4                              | 60.7 ± 1.4                              |
| S <sub>5</sub>       | 62.6 ± 1.5                              | 60.6 ± 1.3                              |
| S <sub>6</sub>       | 58.2 ± 1.1                              | 66.5 ± 1.2                              |
| S <sub>7</sub>       | 59.4 ± 1.5                              | 62.4 ± 1.2                              |
| S <sub>8</sub>       | 57.5 ± 1.2                              | 62.4 ± 1.5                              |
| S <sub>9</sub>       | 61.2 ± 1.6                              | 58.7 ± 1.3                              |
| S <sub>10</sub>      | 57.6 ± 1.5                              | 64.0 ± 1.2                              |
| S <sub>11</sub>      | 61.6 ± 1.3                              | 60.8 ± 1.5                              |
| S <sub>12</sub>      | 59.9 ± 1.5                              | 57.8 ± 1.2                              |

|                 | <b>HDID-1</b> | <b>HDID-2</b> |
|-----------------|---------------|---------------|
| S <sub>13</sub> | 59.3 ± 1.2    | 56.8 ± 1.3    |
| S <sub>14</sub> | 62.8 ± 1.5    | 60.0 ± 1.3    |
| S <sub>15</sub> | 62.8 ± 1.5    | 56.6 ± 1.3    |
| S <sub>16</sub> | 63.1 ± 1.8    | 59.4 ± 1.3    |
| S <sub>17</sub> | 60.2 ± 1.6    | 53.7 ± 1.3    |
| S <sub>18</sub> | 58.4 ± 1.5    | 58.2 ± 1.5    |
| S <sub>19</sub> | 58.3 ± 1.7    | 54.9 ± 1.4    |
| S <sub>20</sub> | 56.9 ± 1.8    | 53.0 ± 1.6    |
| S <sub>21</sub> | 59.9 ± 1.4    |               |
| S <sub>22</sub> | 58.9 ± 1.6    |               |
| S <sub>23</sub> | 61.1 ± 1.7    |               |
| S <sub>24</sub> | 60.5 ± 1.6    |               |
| S <sub>25</sub> | 58.2 ± 1.8    |               |
| S <sub>26</sub> | 55.5 ± 1.8    |               |
| S <sub>27</sub> | 54.7 ± 2.1    |               |
| Average         | 59.6 ± 0.4    | 59.4 ± 0.8    |
